# Supplementary material for: Comparison of cytotoxicity and membrane efflux pump inhibition in HepG2 cells induced by single-walled carbon nanotubes with different length and functional groups
Source: PubMed Central journal article supplement (PMC6525162; doi:10.1038/s41598-019-43900-5), 2019-05-17
Supplement: 41598_2019_43900_MOESM1_ESM.pdf [file 41598_2019_43900_MOESM1_ESM.pdf]

**Supporting Information for**

**Comparison of cytotoxicity and membrane efflux pump inhibition  
in HepG2 cells induced by single-walled carbon nanotubes with  
different length and functional groups**

Zhuoyan Shen, Jialu Wu, Yue Yu, Su Liu, Wei Jiang, Habiba Nurmamat, Bing Wu\*

State Key Laboratory of Pollution Control and Resource Reuse, School of the  
Environment, Nanjing University, Nanjing, 210023, P.R. China

\* Corresponding author

*E-mail:* bwu@nju.edu.cn (B.Wu)

*Postal address:* NO 163 Xianlin Avenue, Nanjing, 210023, China

**Table S1.** Z-average size of six SWCNTs used in this study

|                     | S-L   | S-L-COOH | S-L-OH | S-S   | S-S-COOH | S-S-OH |
|---------------------|-------|----------|--------|-------|----------|--------|
| Z-average size (nm) | 375.7 | 491.3    | 555.6  | 201.9 | 156.9    | 178.2  |

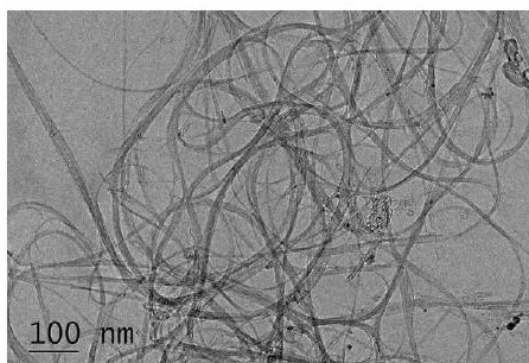

(a)

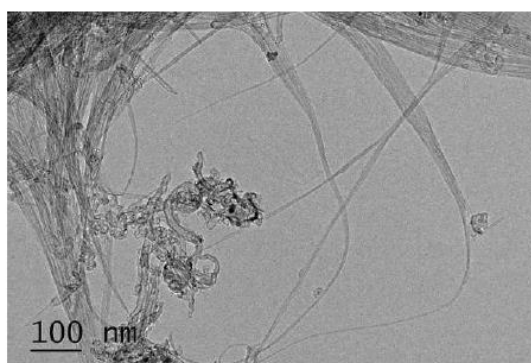

(b)

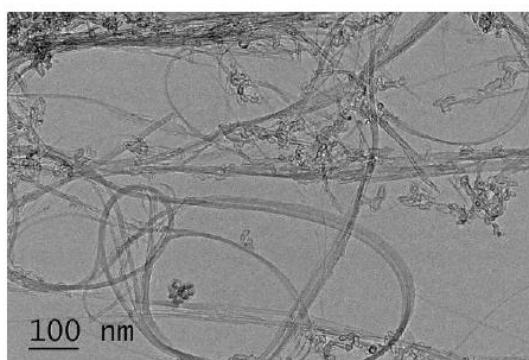

(d)

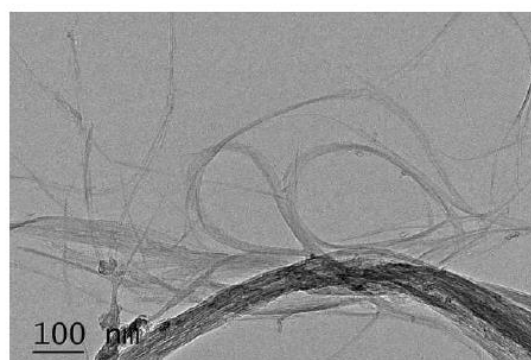

(e)

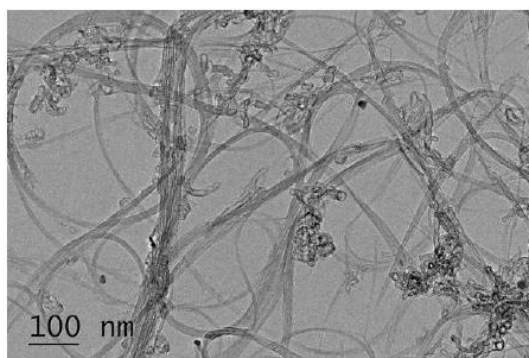

(f)

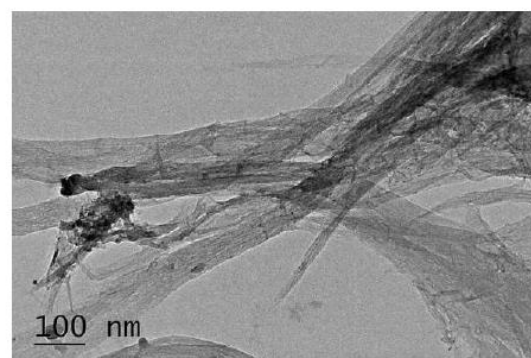

(g)

**Fig. S1** TEM images of the six SWCNTs used in this study. (a) S-L; (b) S-S; (c) S-L-COOH; (d) S- S-COOH; (e) S-L-OH; (f) S-S-OH

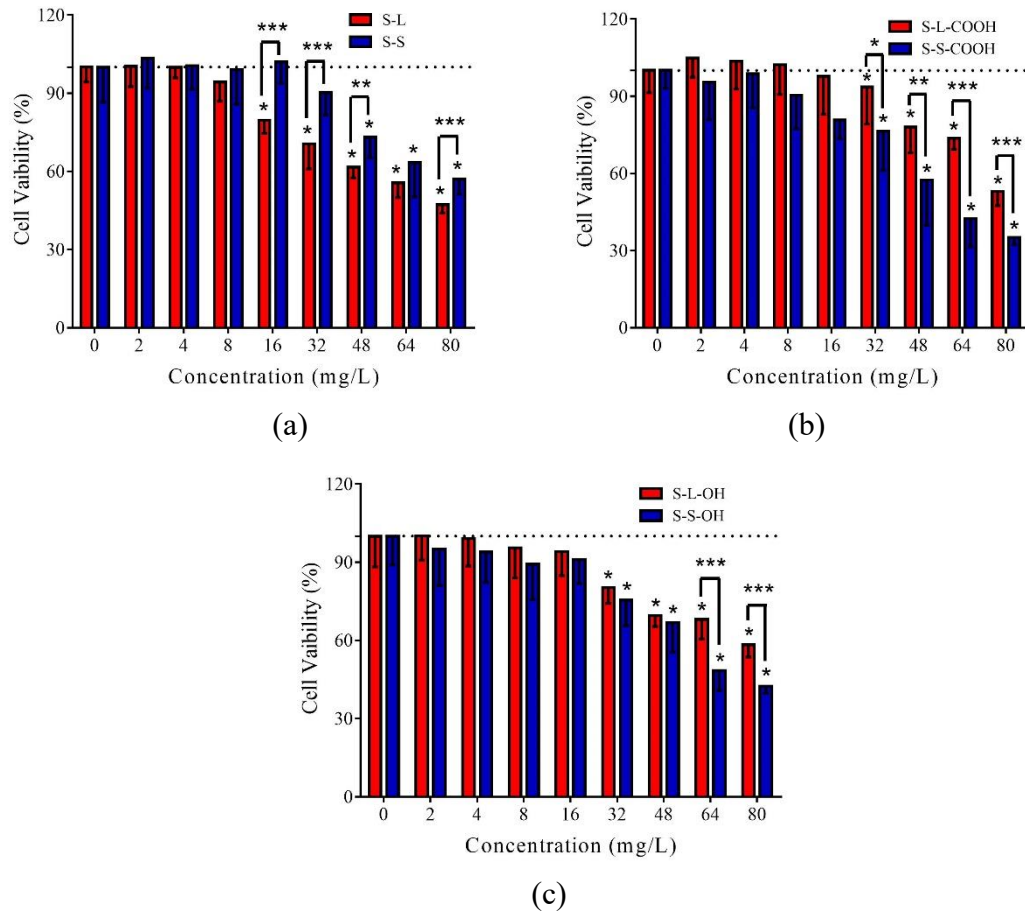

**Fig. S2** Cell viability of HepG2 cells treated with the SWCNTs for 24 h. (a) S-L and S-S; (b) S-L-COOH and S-S-COOH; (c) S-L-OH and S-S-OH. All the data are shown as the mean  $\pm$  standard deviation. The differences among groups were identified by one-way ANOVA followed by Tukey post hoc test. \* indicates the  $p$ -value  $< 0.05$ .

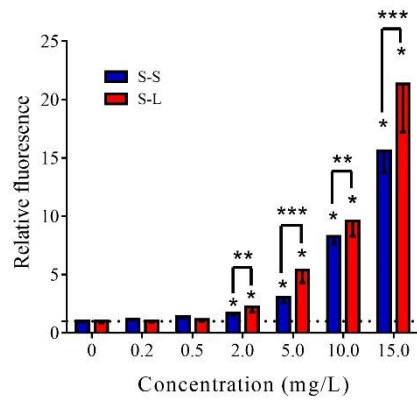

(a)

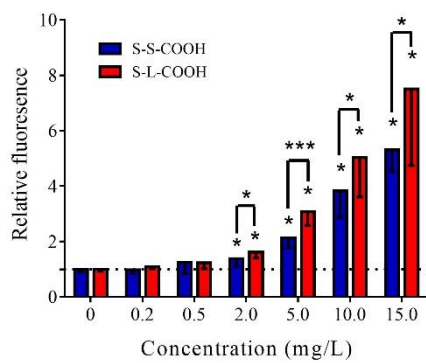

(b)

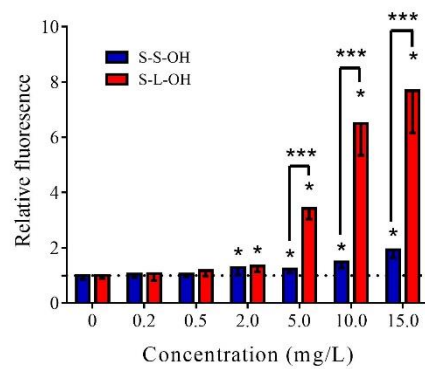

(c)

**Fig. S3** Intracellular ROS level induced by the SWCNTs. (a) S-L and S-S; (b) S-L-COOH and S-S-COOH; (c) S-L-OH and S-S-OH. All the data are shown as the mean  $\pm$  standard deviation. The differences among groups were identified by one-way ANOVA followed by Tukey post hoc test. \* indicates the  $p$ -value  $< 0.05$ .

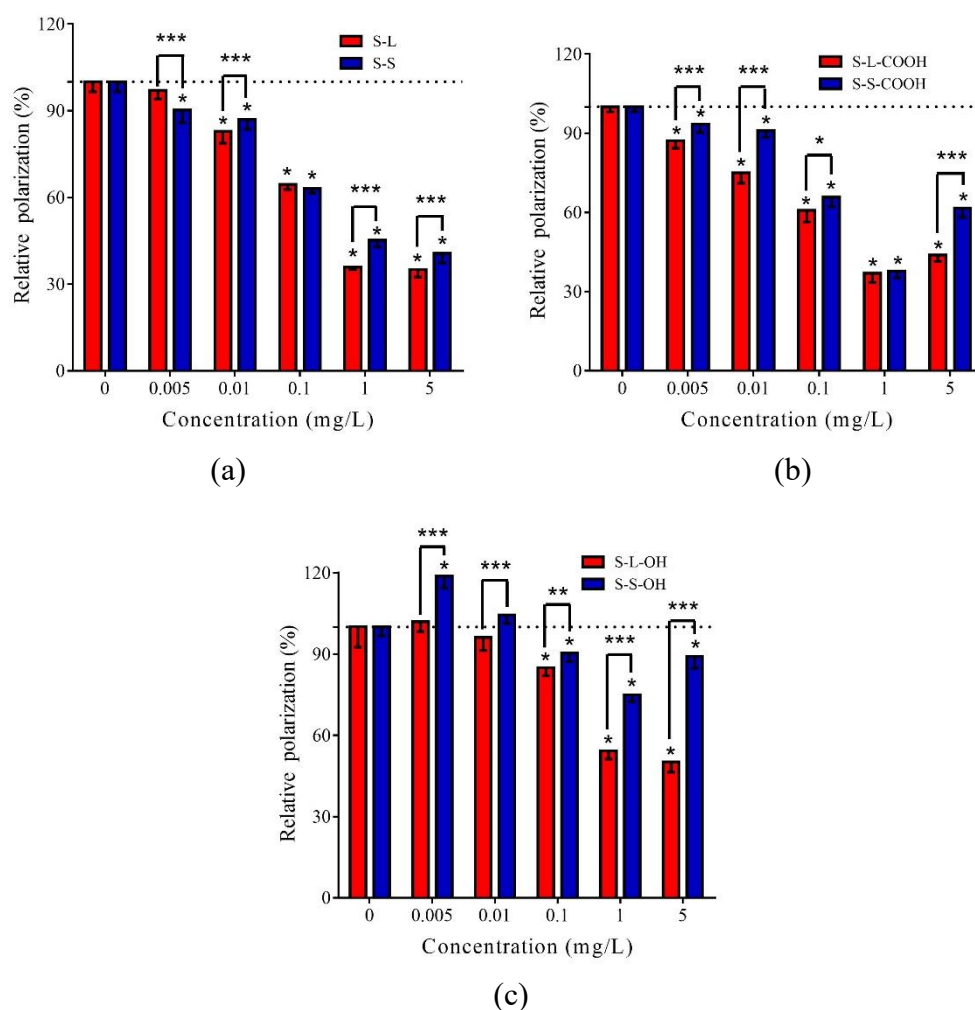

**Fig. S4** Effect of SWCNTs on cell membrane fluidity. Decrease of relative P value of TMA-DPH indicates the increase of membrane fluidity. (a) S-L and S-S; (b) S-L-COOH and S-S-COOH; (c) S-L-OH and S-S-OH. All the data are shown as the mean  $\pm$  standard deviation. The differences among groups were identified by one-way ANOVA followed by Tukey post hoc test. \* indicates the  $p$ -value < 0.05.
